# Supplementary material for: HP1a, Su(var)3-9, SETDB1 and POF stimulate or repress gene expression depending on genomic position, gene length and expression pattern in Drosophila melanogaster
Source: PubMed Central journal article supplement — Nucleic Acids Res. 2013 Mar 9;41(8):4481–94. doi: 10.1093/nar/gkt158 (PMC3632140; doi:10.1093/nar/gkt158), 2013-03-09

## Supplementary Data for

HP1a, Su(var)3-9, SETDB1 and POF stimulate or repress gene expression depending on genomic position, gene length and expression pattern in *Drosophila melanogaster*

Lina E Lundberg<sup>1</sup>, Per Stenberg<sup>1,2</sup> and Jan Larsson<sup>1\*</sup>

<sup>1</sup>Department of Molecular Biology, Umeå University, SE-90187 Umeå, Sweden and <sup>2</sup>Computational Life Science Cluster (CLiC), Umeå University, SE-90187 Umeå, Sweden

**This PDF includes:**

Supplementary Figure S1

## LEGENDS SUPPLEMENTARY DATA

**Supplementary Figure 1.** Mean expression ratio for probe sets that are undefined in the Affymetrix expression array (“undefined probe sets”) and all probe sets that have defined gene names (“genes”) in an *HP1a* mutant, for all probe sets with a gene length (distance between transcriptional start and stop site) shorter than 0.5 kb (**A**), and for all genes (**B**).  $n=93$  for “undefined probe sets <0.5 kb”,  $n=314$  for “genes <0.5kb”,  $n=521$  for “all undefined probe sets” and  $n=9065$  for “all genes”. Both y-axis values are on a  $\log_2$  scale. Squares indicate mean values (on a  $\log_2$  scale) and whiskers indicate the 95% confidence intervals.

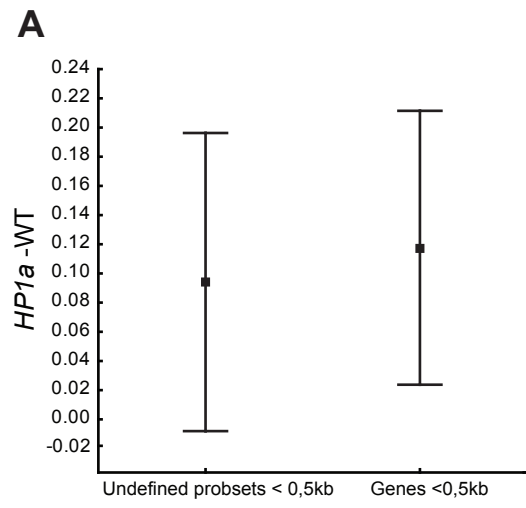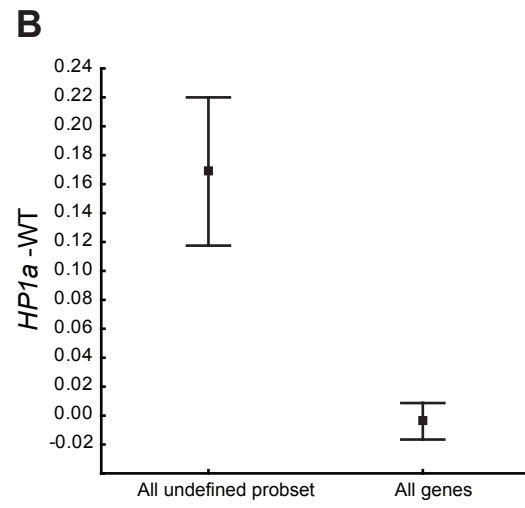

Supplement: supp_gkt158_nar-00111-x-2013-File008.pdf [file supp_gkt158_nar-00111-x-2013-File008.pdf]
